# Supplementary material for: Neuroblastoma and pre-B lymphoma cells share expression of key transcription factors but display tissue restricted target gene expression
Source: PubMed Central journal article supplement (PMC544580; doi:10.1186/1471-2407-4-80), 2004-11-15

## **Attachment A.**

The attachment displays gene expression maps of gene sets with specific expression patterns. On top of every diagram is a hierarchical tree based on cDNA micro-array analysis of the expression of 2162 genes in a set of cell lines as indicated. Each individual hybridization experiment is represented by the name of the cell line and the number of the experiment. THP-1 is a human myeloma cell line, HeLa a human epithelial cell line, Nalm6 and KM3 represents human pre-B lymphoma. SY represents the neuroblastoma cell line SH-SY5Y and SK the neuroblastoma cell line SK-N-BE(2)c. Red represents high expression of the gene as compared to the pooled control RNA while green indicates low expression.

Scans were analyzed using GenePix Pro versions 4.0.1.9 and 4.1.1.4. BioArray Software Environment (BASE) (Saal et al. Genome Biology 2002, 3(8):software0003.1-0003.6). The settings for the analysis presented were Background Correlation: Mean FG - Mean BG, Spot filter: (Raw) SNR ch1 mean  $\geq$  2, (Raw) SNR ch2 mean  $\geq$  2, (Raw) Flags = 0, (Raw) Spot diameter  $\geq$  40, Normalization: Lowess, Reporter filter: in # of assays = 16, Analysis: Hierarchical clustering (reporter)

# Genes overexpressed in Epithelial (HeLa) cells

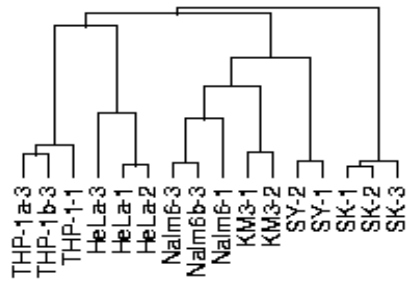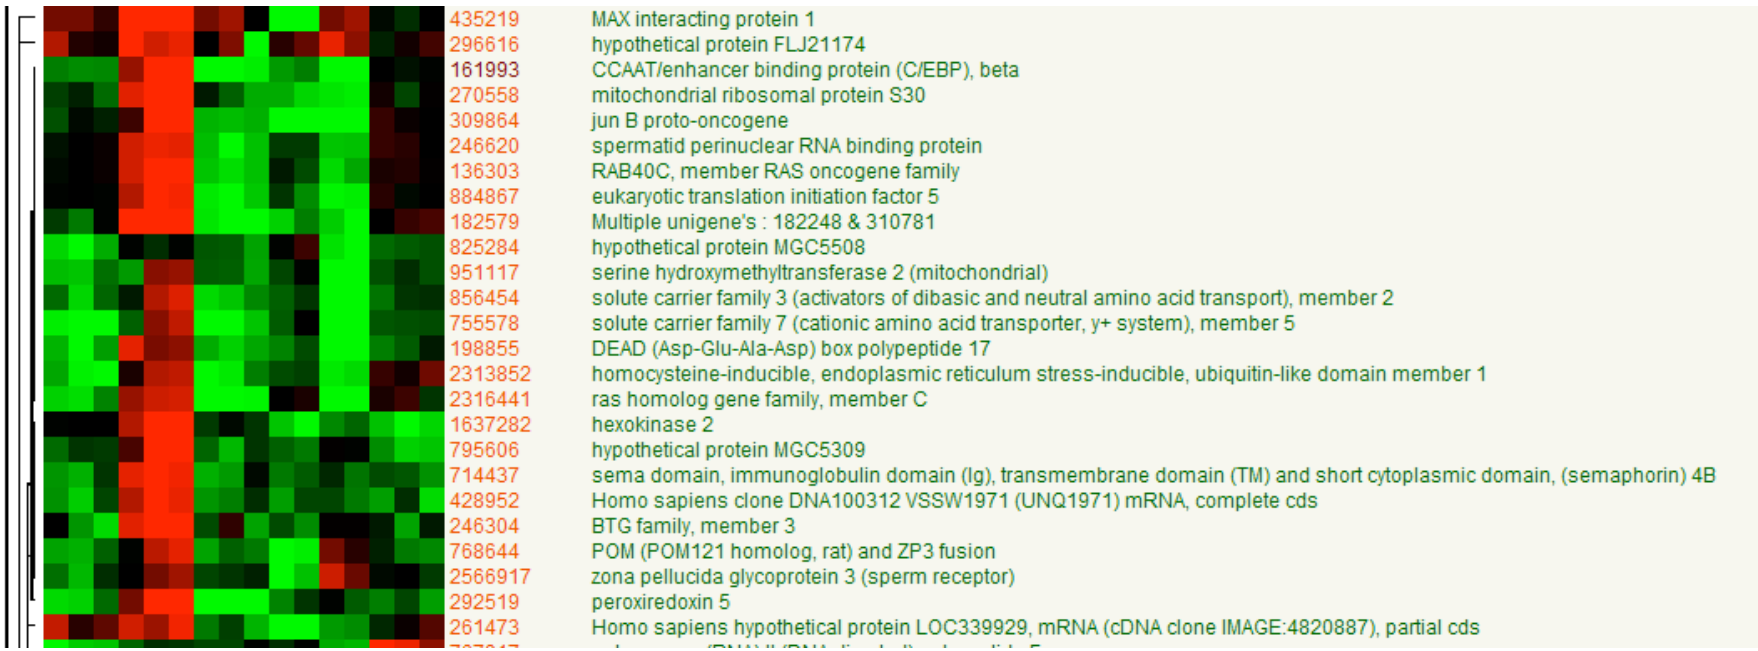

## Genes overexpressed in Epithelial and Pre-B lymphoma cells

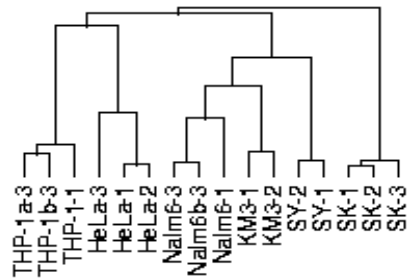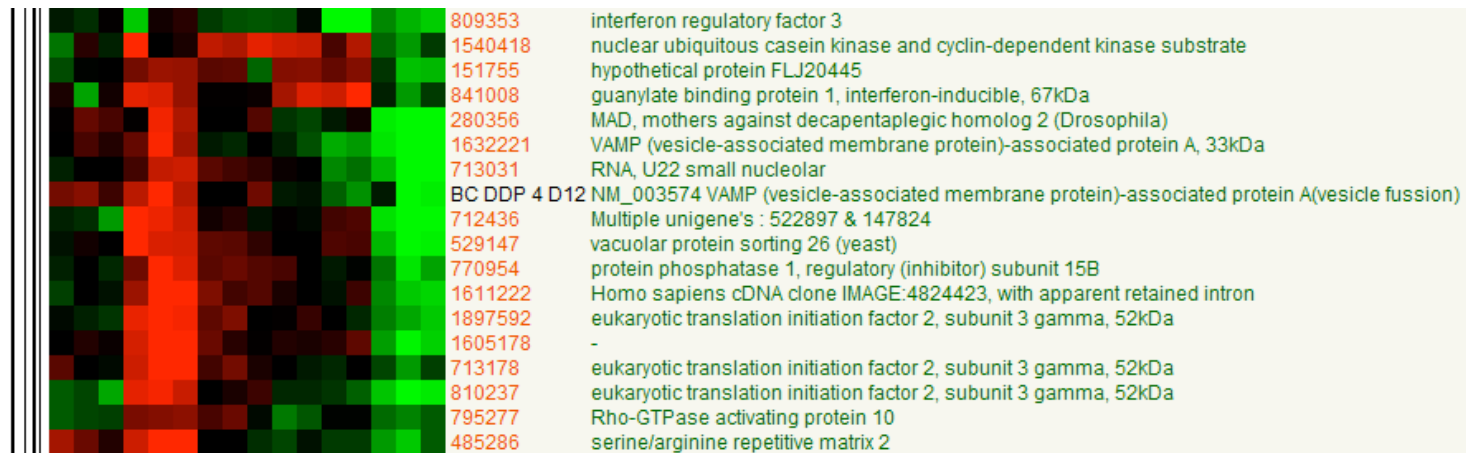

## Genes overexpressed in Neuroblastoma cells

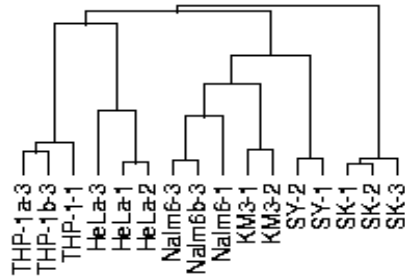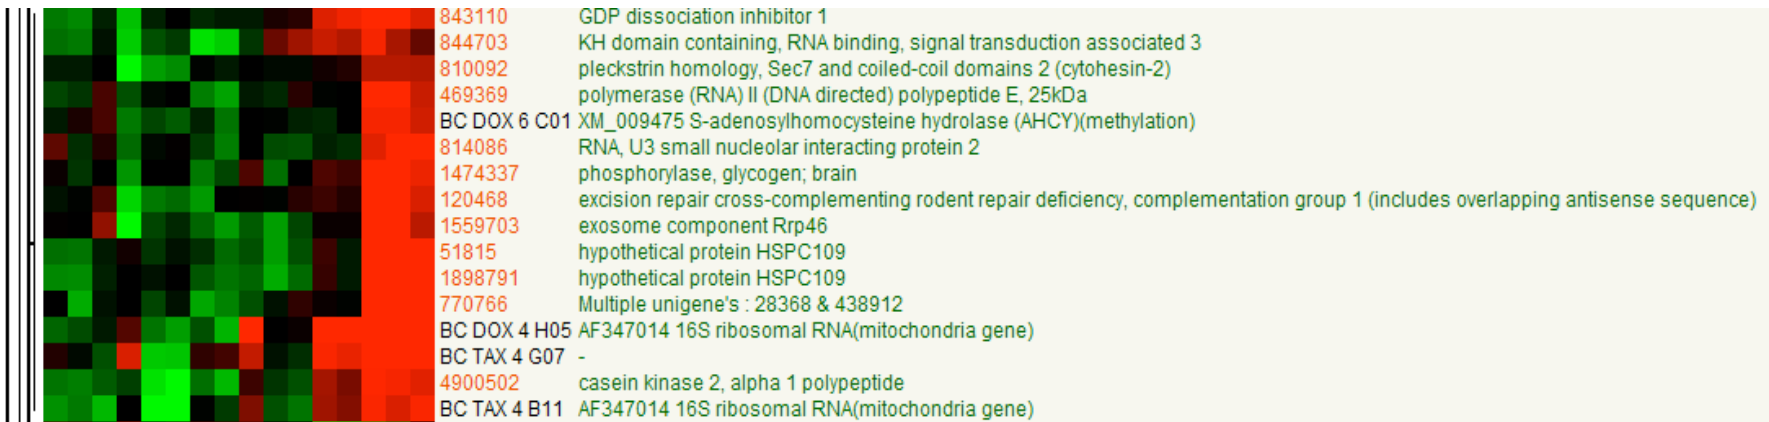

## Genes overexpressed in Myeloid leukemia and Pre-B lymphoma cells

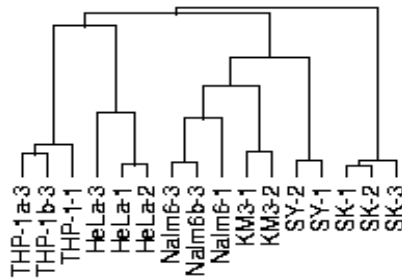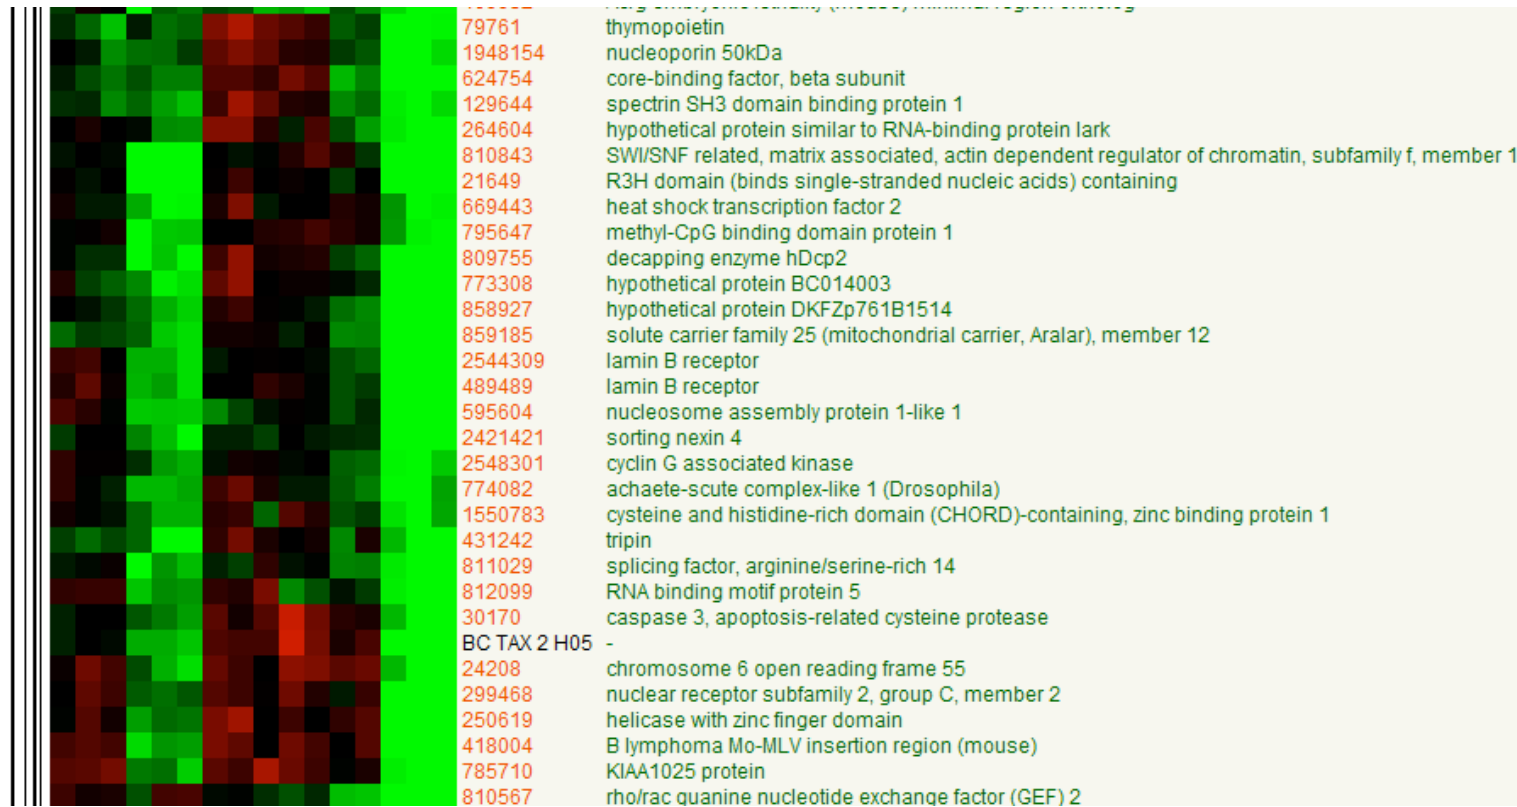

# Genes overexpressed in Myeloid leukemia cells

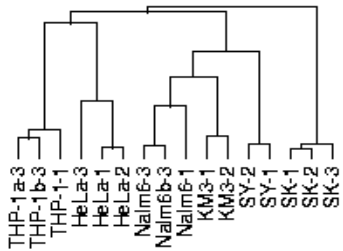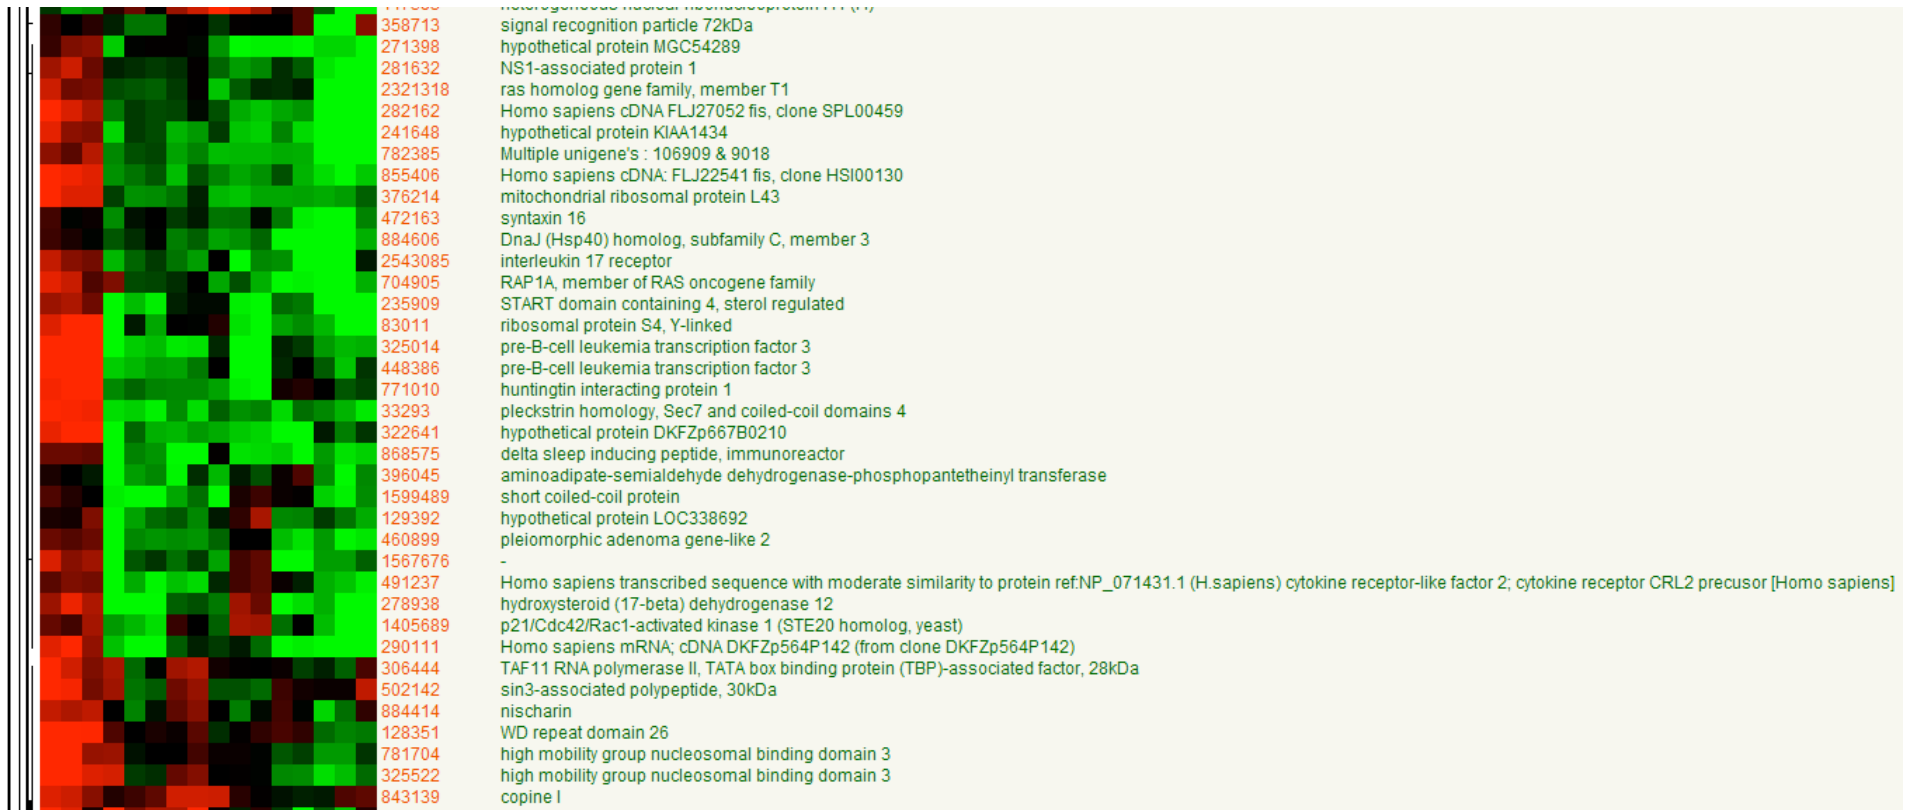

## Genes overexpressed in Neuroblastoma and Pre-B leukemia cells

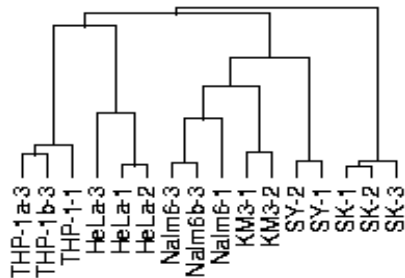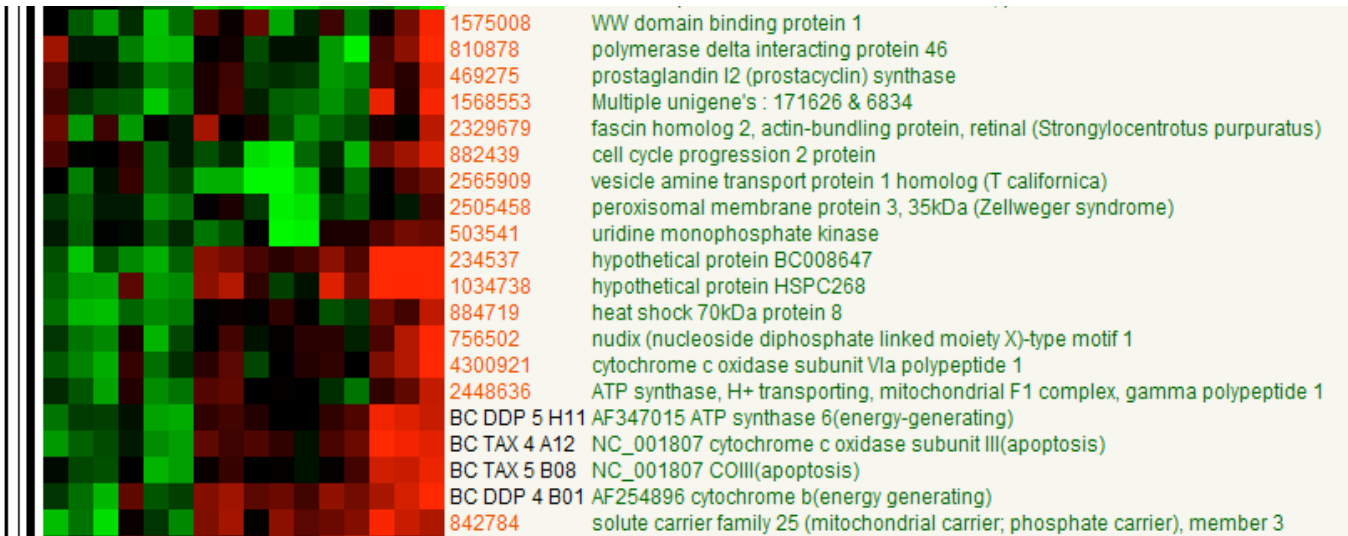

## Genes overexpressed in Neuroblastoma cells

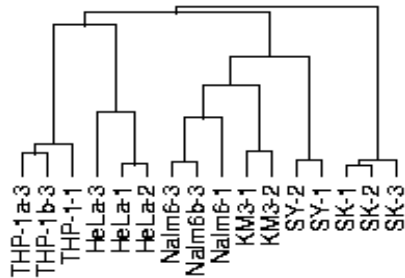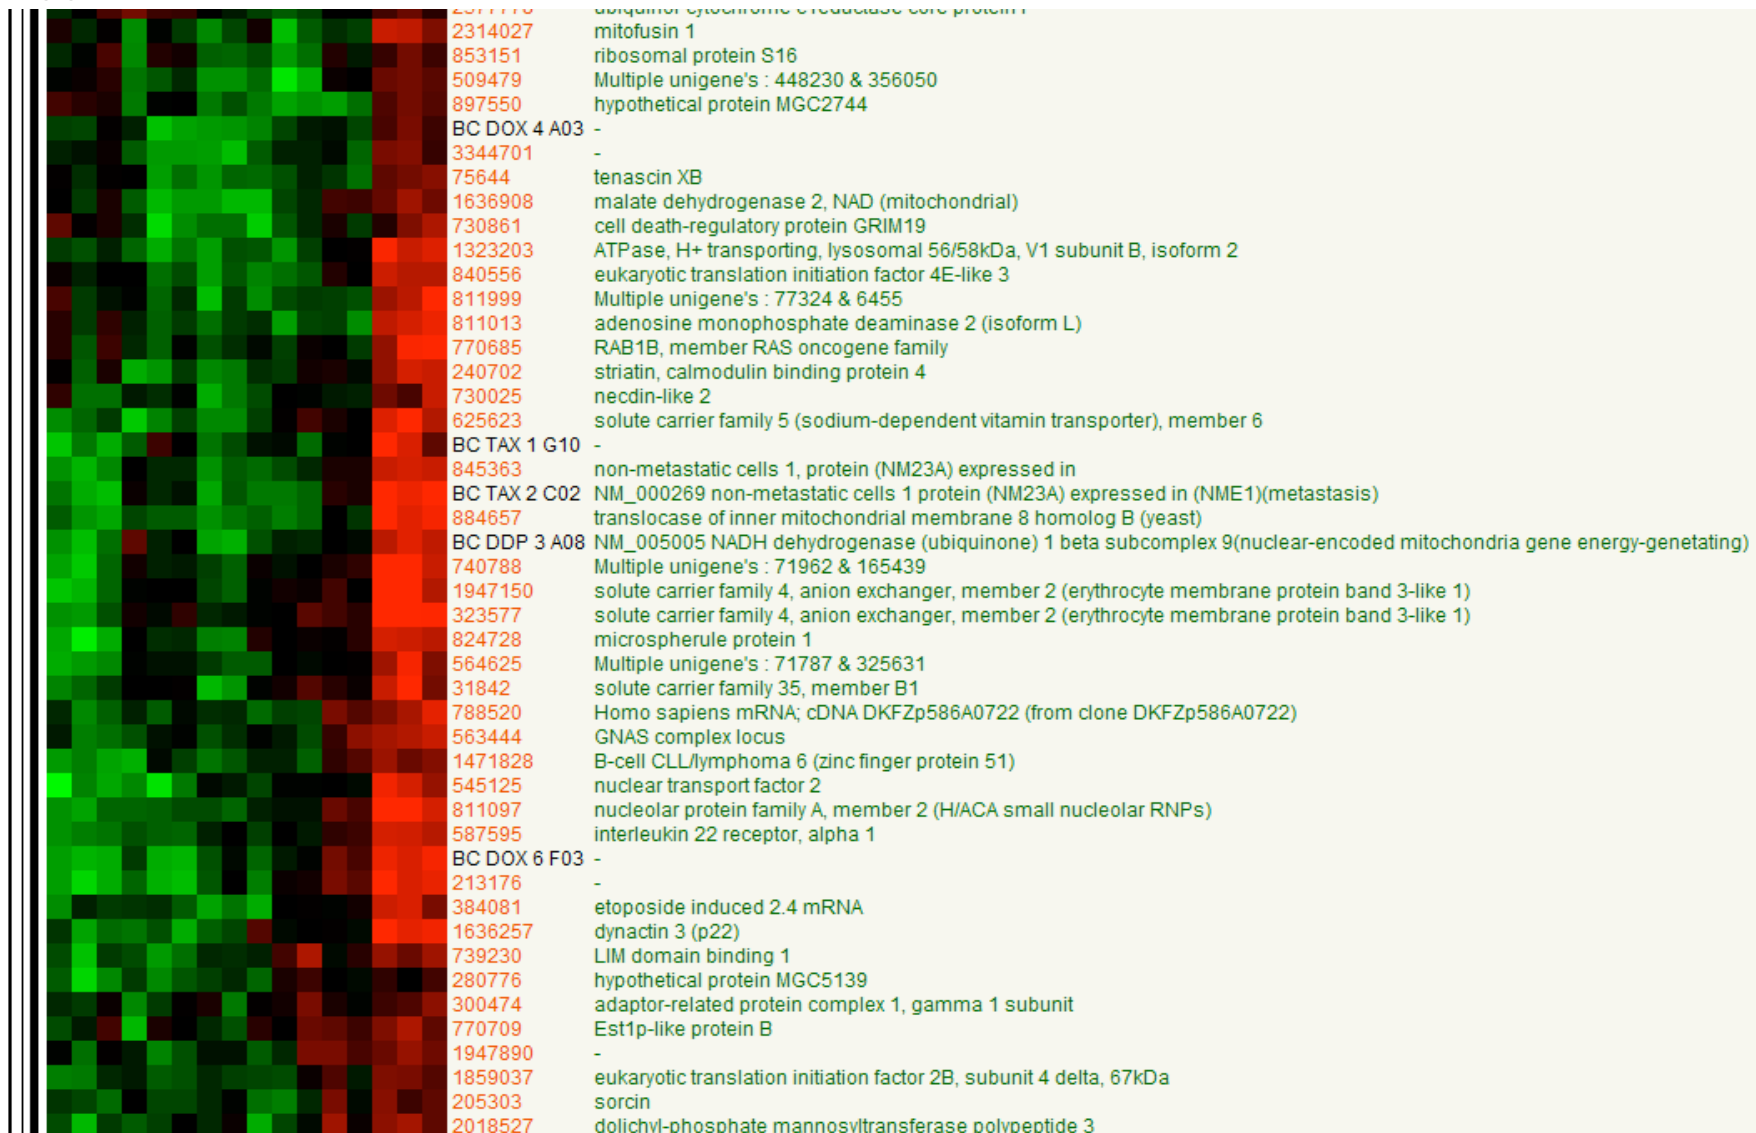



# Genes overexpressed in Neuroblastoma (SK) and Epithelial (HeLa) cells

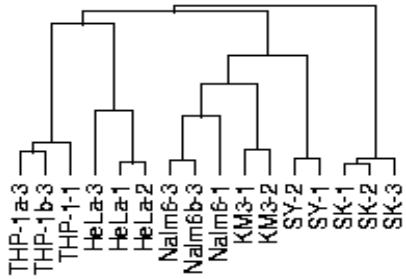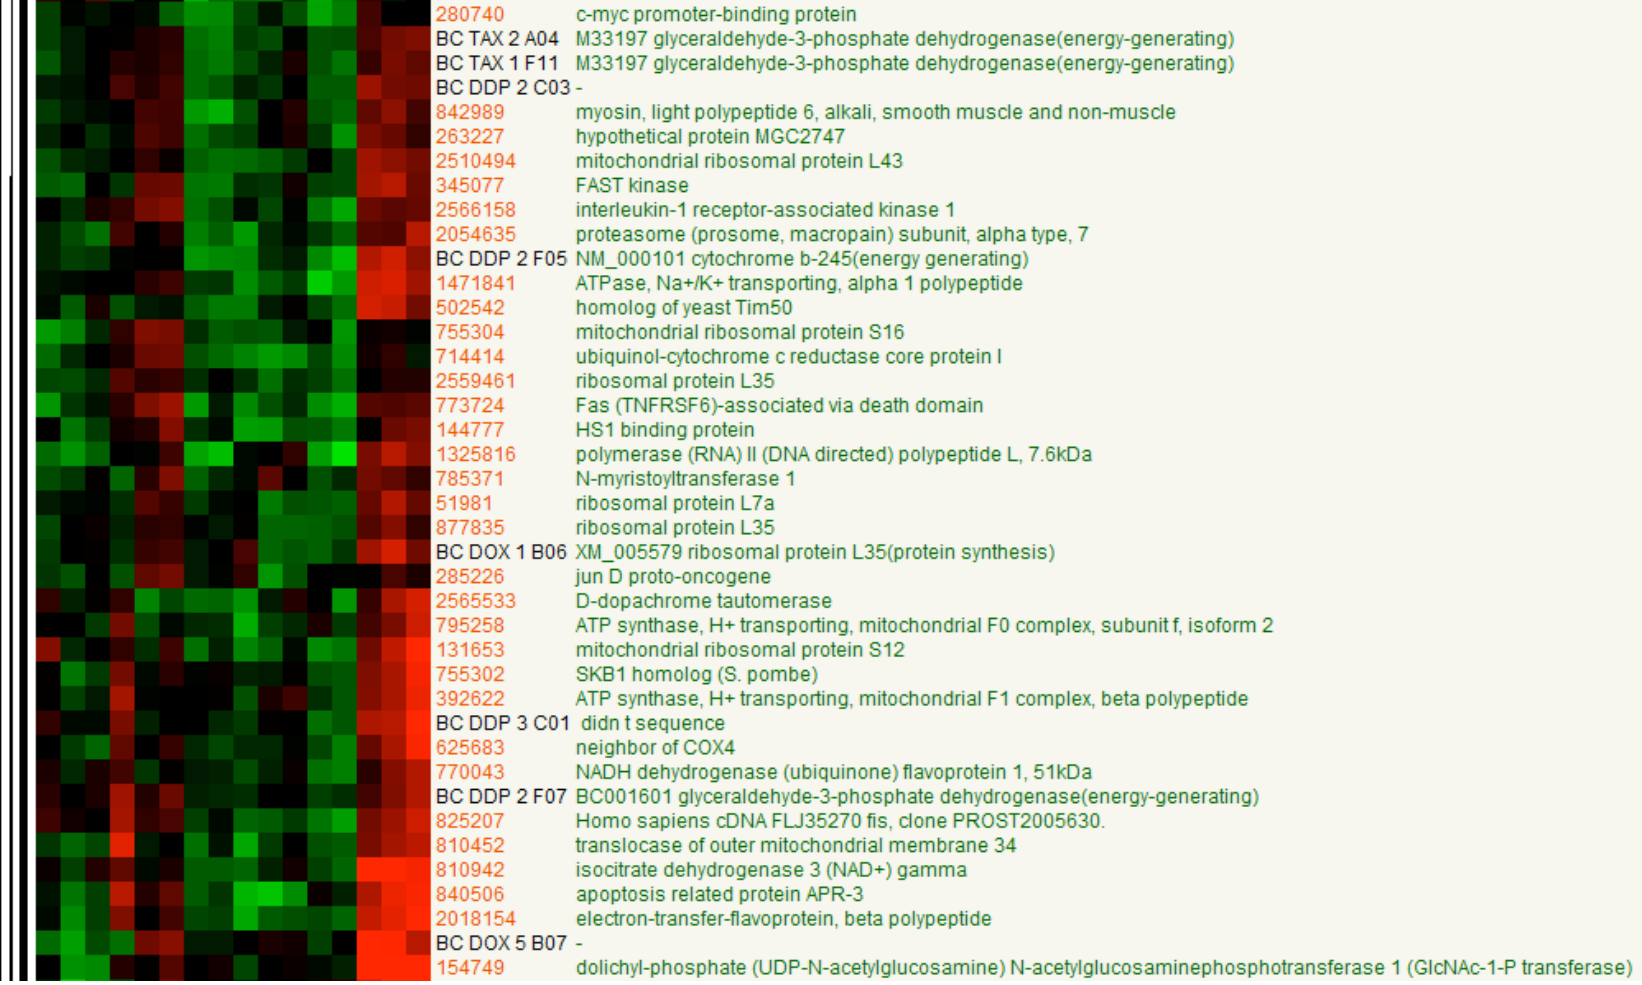

## Genes overexpressed in Pre-B lymphoma cells

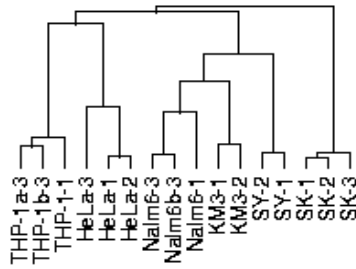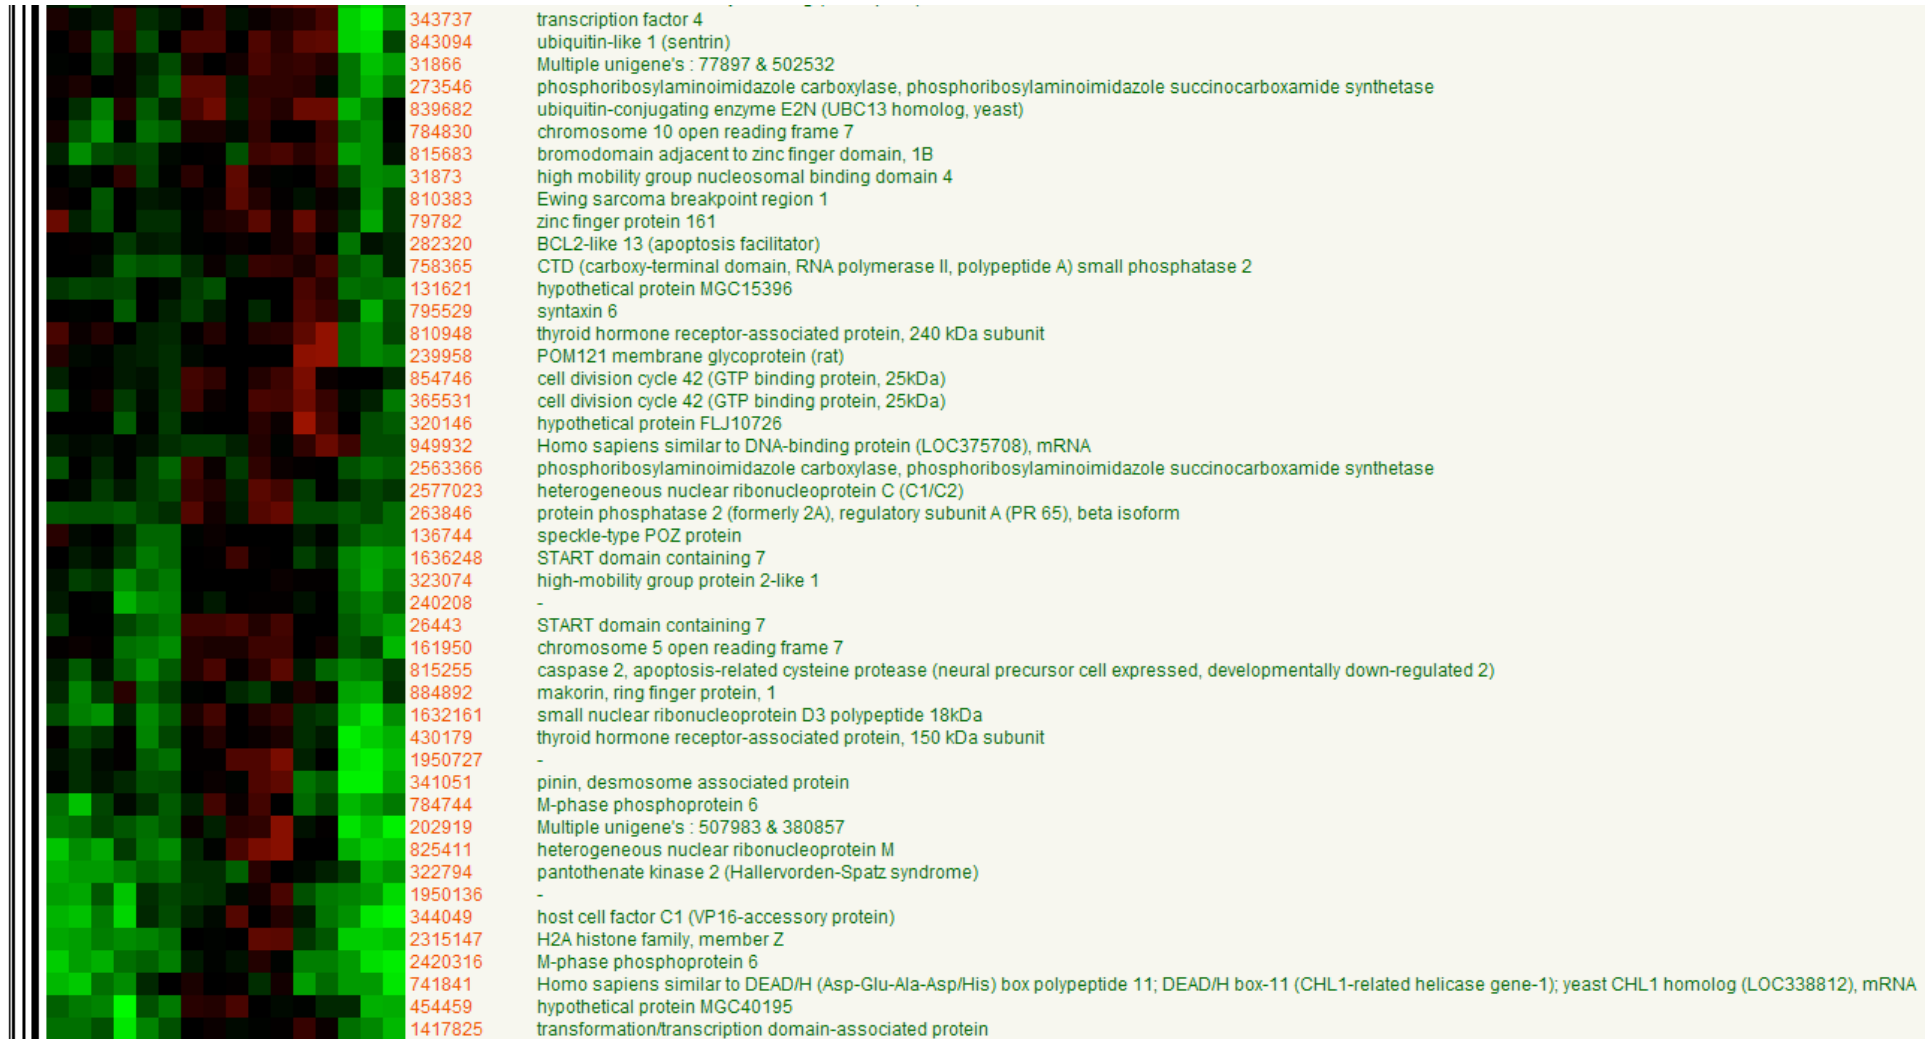

## Genes down regulated in SK Neuroblastoma cells

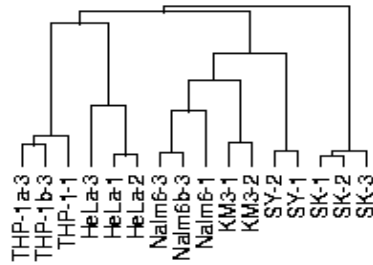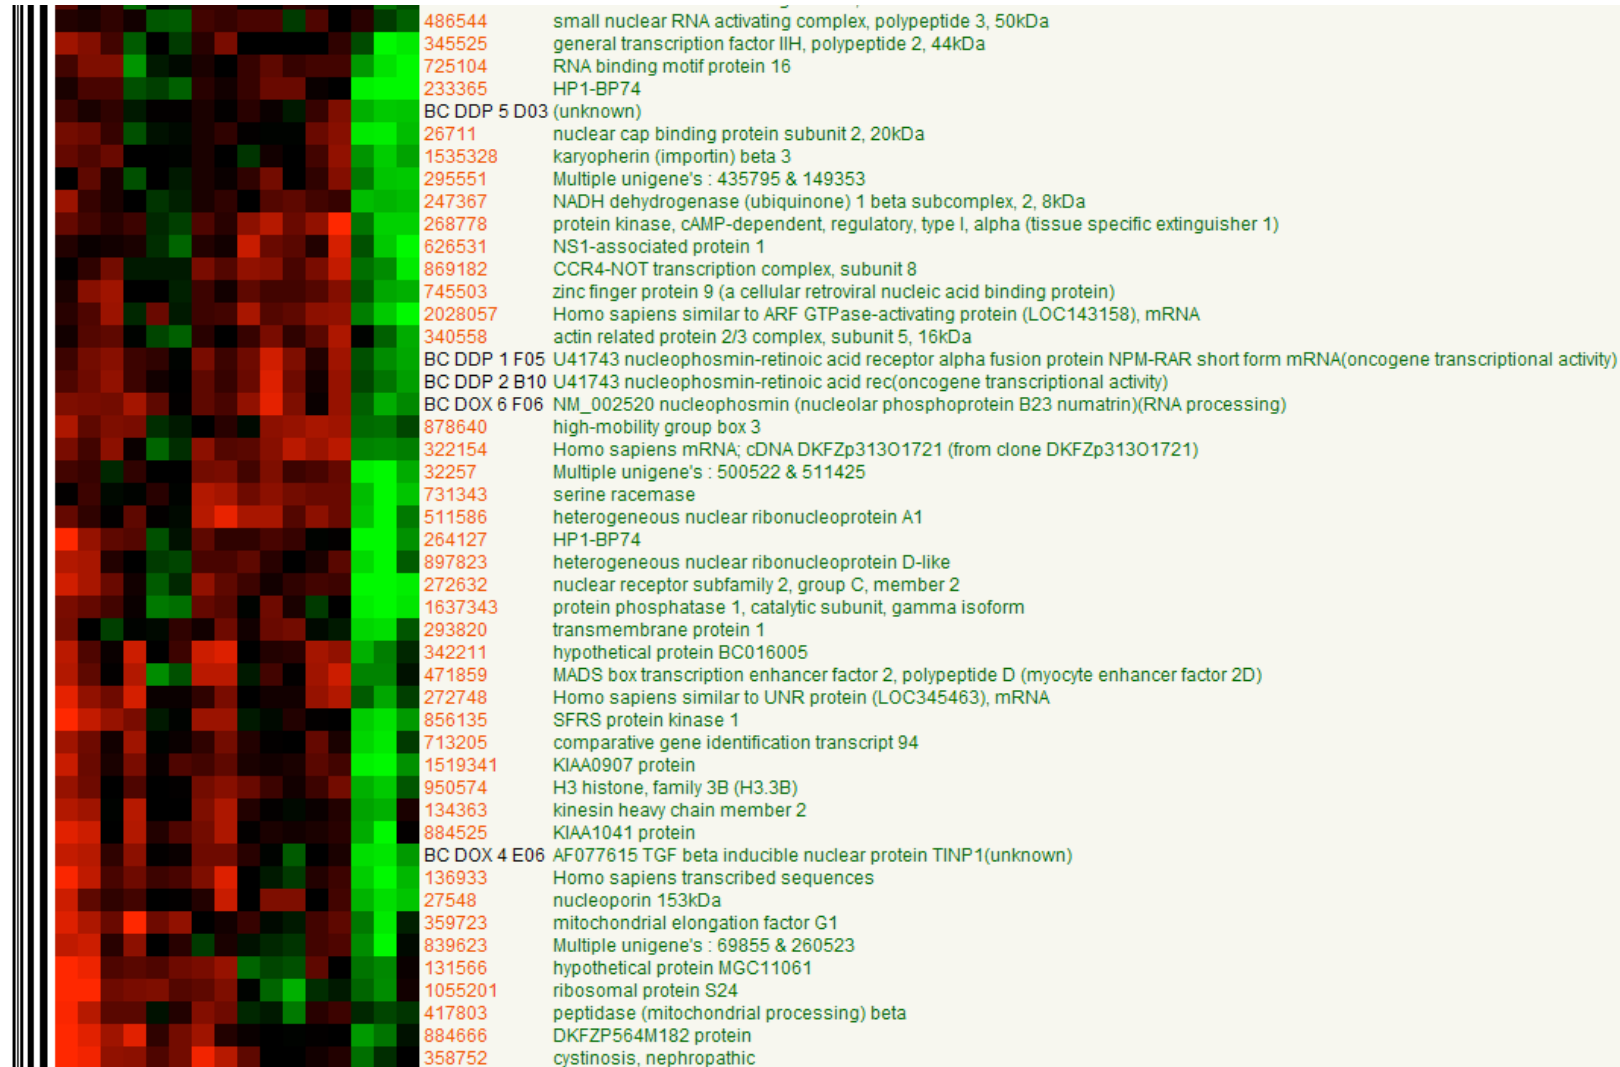

## Genes overexpressed in Pre-B lymphoma cells

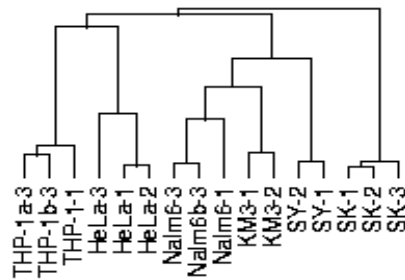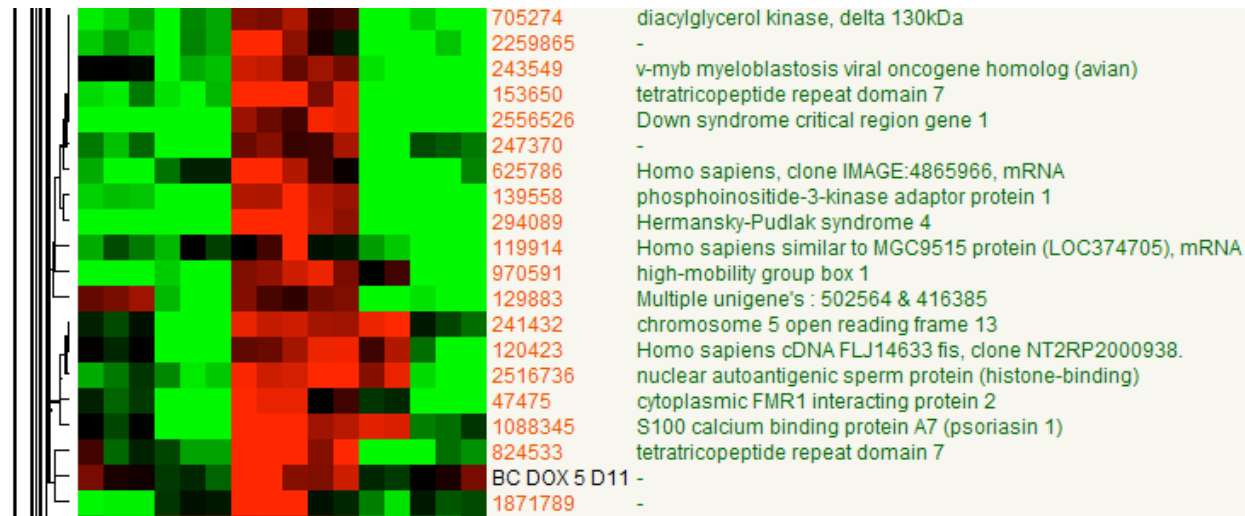

Supplement: 1471-2407-4-80-S1.pdf [file 1471-2407-4-80-S1.pdf]
